# Supplementary material for: Truncated variants of MAGEL2 are involved in the etiologies of the Schaaf-Yang and Prader-Willi syndromes
Source: PubMed Central journal article supplement (PMC11267527; doi:10.1016/j.ajhg.2024.05.023), 2024-06-21
Supplement: mmc1.pdf [file mmc1.pdf]

**The American Journal of Human Genetics, Volume 111**

**Supplemental information**

**Truncated variants of MAGEL2 are involved  
in the etiologies of the Schaaf-Yang and Prader-Willi syndromes**

**David Heimdörfer, Alexander Vorleuter, Alexander Eschböck, Angeliki Spathopoulou, Marta Suarez-Cubero, Hesso Farhan, Veronika Reiterer, Melanie Spanjaard, Christian P. Schaaf, Lukas A. Huber, Leopold Kremser, Bettina Sarg, Frank Edenhofer, Stephan Geley, Mariana E.G. de Araujo, and Alexander Huettnerhofer**

## Supplemental Material

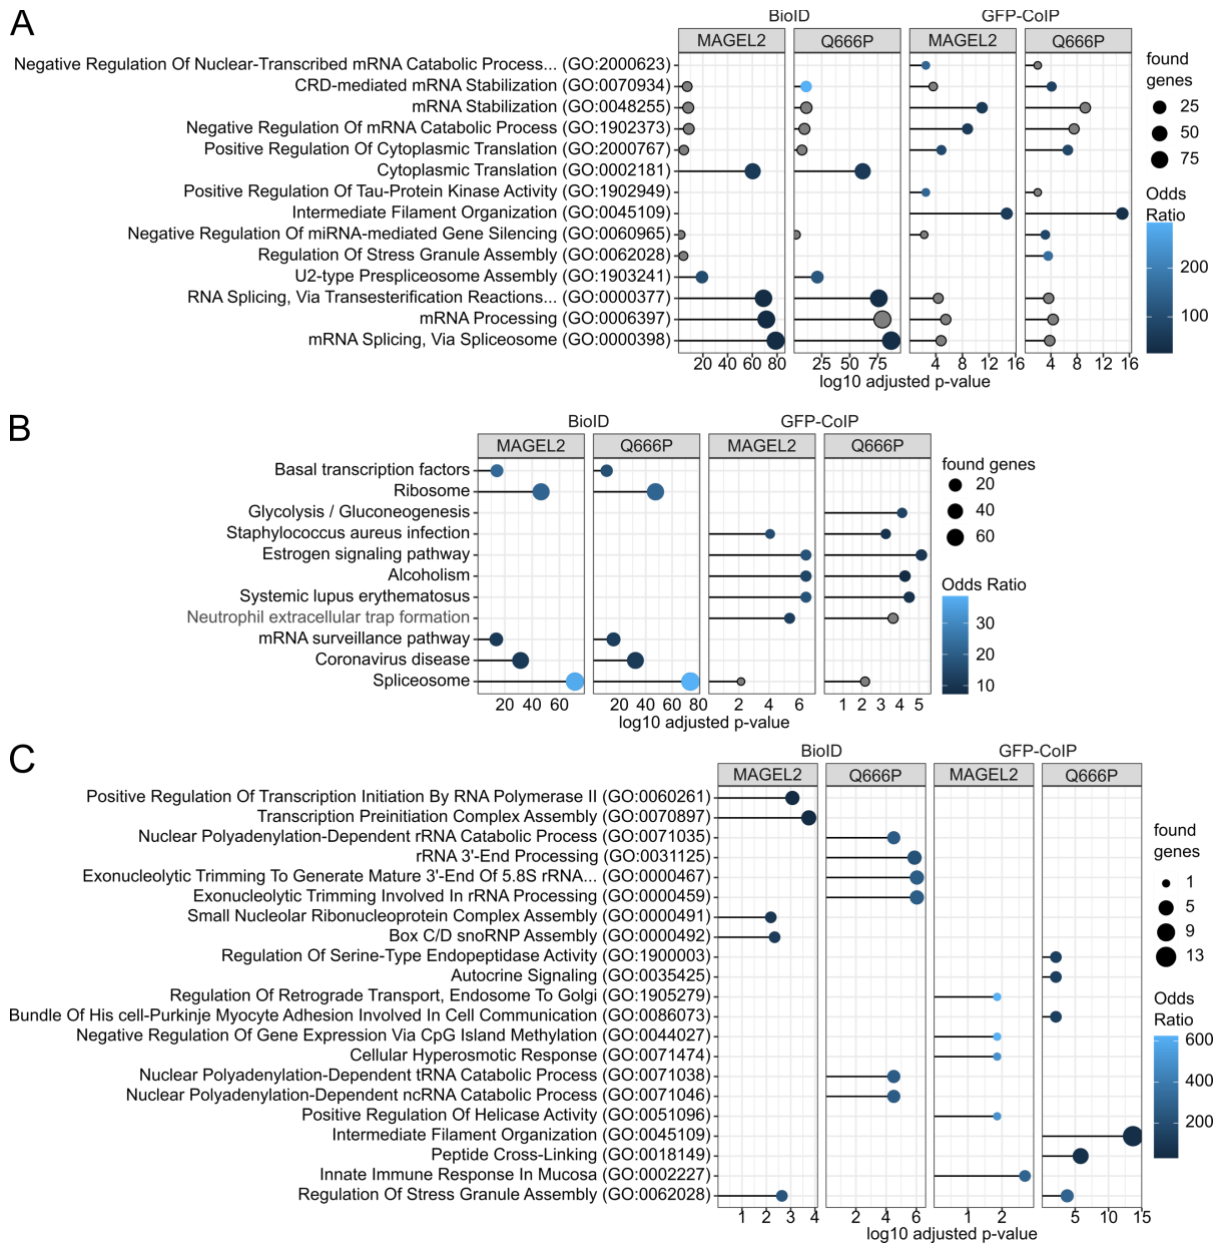

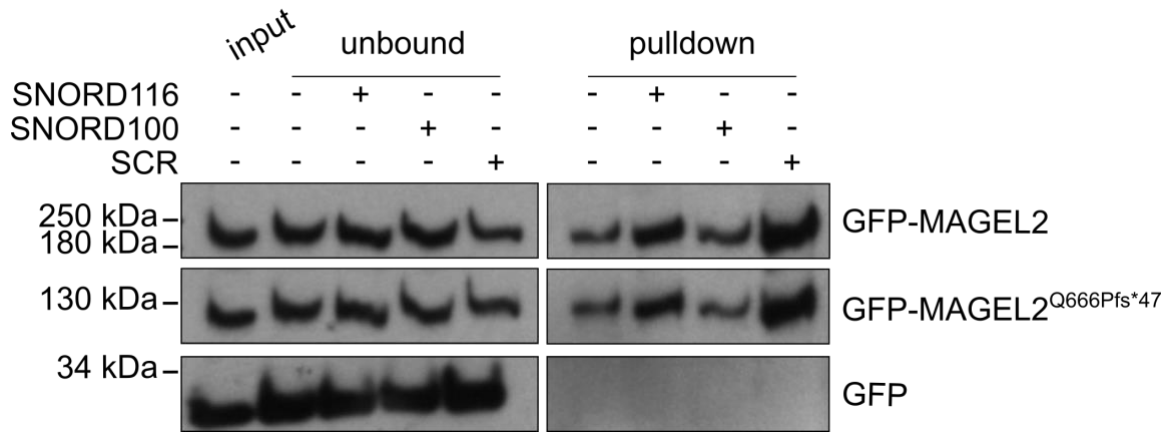

**Figure S2:** Western blot analysis following RNA-CoIP of HEK293T IP lysates with transiently overexpressed GFP, GFP-MAGEL2 and GFP-MAGEL2 p.(Gln666Profs\*47).

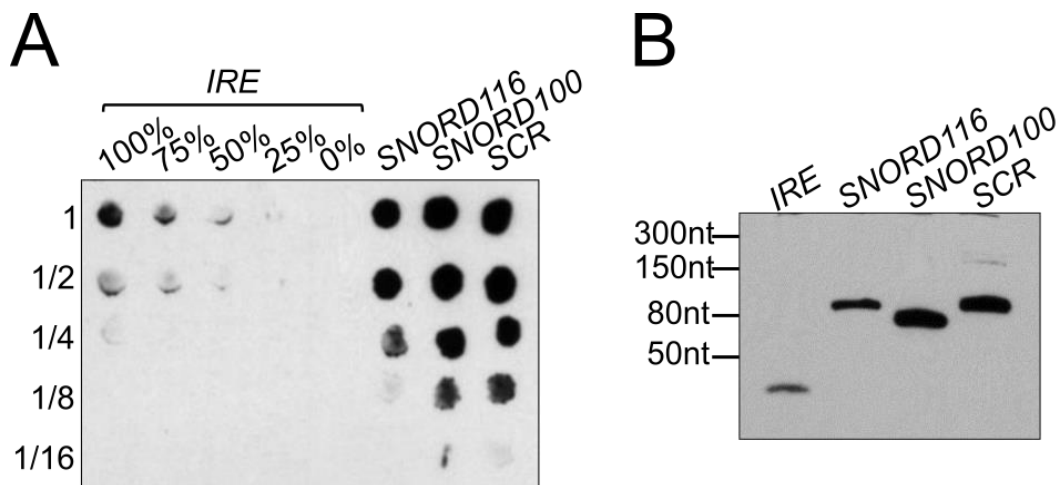

**Figure S3: Efficiency of biotinylation of SNORD116, SNORD100 and the SCR control.** A and B: 3'-biotinylation of RNAs was analyzed by dot blot analysis employing a dilution series (A) and on an 8% polyacrylamide gel (7 M urea) (B). As control served a biotinylated IRE RNA from the company (Thermo Fisher Scientific).

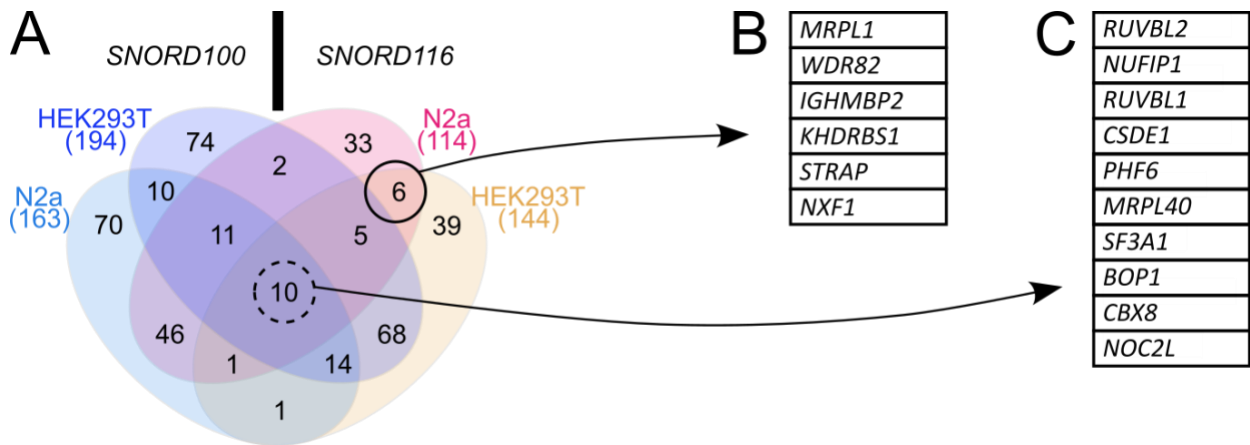

**Figure S4: A: Venn diagram of interactomes identified by RNA-CoIP with 3'-biotinylated RNAs in HEK293T and N2A IP lysates.** Only proteins identified in at least 2 of 3 replicates were analyzed. Putative unspecific interactors were removed employing a scrambled RNA control (see Fig 4B) for per cell type. **B: Specific proteins (gene names depicted) bound to *SNORD116* in HEK293T and N2A.** **C: Mutual proteins (gene names depicted) of *SNORD116* and *SNORD100* in both examined cell types.**

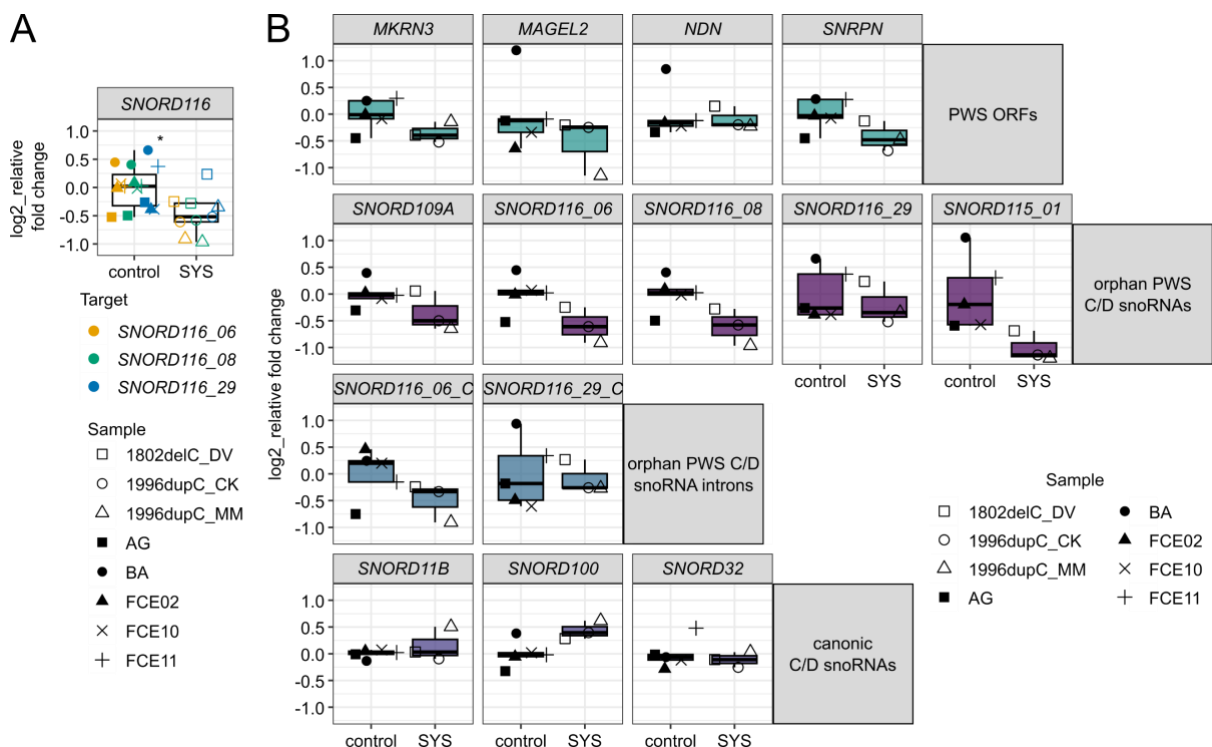

**Figure S5: Expression analysis of genes from the PWS region by qPCR analysis. A: Pooled RT-qPCRs for investigated *SNORD116* copies 06, 08, and 29 in smNPCs, rstatix<sup>2</sup> was used for the calculation of Wilcoxon tests B: .RT-qPCR of individual transcripts in smNPCs, which were used for analysis in *Error! Reference source not found.A.***

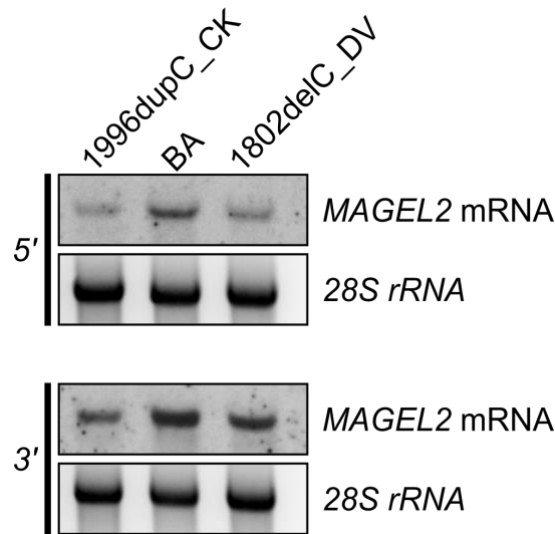

**Figure S6: Northern blot analysis of wt and mutant MAGEL2 mRNA transcripts from healthy and SYS smNPCs.** Probes for expression analysis of wt (BA) or mutant (1996dupC\_CKMAGEL2, 1802delC\_DV) mRNAs are indicated as 5' or 3', respectively; as a loading control expression of 28S rRNA is shown.

| antibody                                  | company        | product-no. | clonality [clone] | host   | dilution                    |
|-------------------------------------------|----------------|-------------|-------------------|--------|-----------------------------|
| anti-EEA1                                 | Abcam          | ab109110    | mono [EPR4245]    | rabbit | 750 (HEK 293T)<br>500 (N2a) |
| anti-RAB11A                               | Cell signaling | #2413       | poly              | rabbit | 50                          |
| anti-FMRP                                 | Cell Signaling | #4317       | poly              | rabbit | 50                          |
| anti-SMN                                  | Proteintech    | #11708      | poly              | rabbit | 400                         |
| anti-RAB11A                               | Thermo Fischer | #715300     | poly              | rabbit | 50                          |
| <b>CoraLite488-conjugated anti-Rabbit</b> | Proteintech    | SA00013-2   | poly              | goat   | 250                         |

**Table S1: Antibodies used in IF-analyses.** All antibodies employed in this study are depicted above, as well as the host they were derived from and the dilution used in the study.

| Target              | Sequence [5' to 3']                                                                                                                     | forward [5' to 3']                             | reverse [5' to 3']       |
|---------------------|-----------------------------------------------------------------------------------------------------------------------------------------|------------------------------------------------|--------------------------|
| <i>SNORD116_3/9</i> | <u>GGATCCTAATACGACTCACTATAGGATCGATGA</u><br>TGAGTCCCCCATAAAAACATTTCCTTGAAAAGC<br>TGAACAAAATGAGTGAGAACTCATACCGTCGTT<br>CTCATCGGAAGTGGTCC | GGATCCTAATACGA<br>CTCAC                        | GGACCTCAGTTCCG<br>ATGA   |
| <i>SNORD100</i>     | <u>GGATCCTAATACGACTCACTATAGCTGTACATG</u><br>ATGACAAGTGGCTCCCTCTACTGAACTGCCATG<br>AGGAAACTGCCATGTCACCCCTTCTGATTACAGC                     | GGATCCTAATACGA<br>CTCAC                        | GCTGTAATCAGAAG<br>GGTGA  |
| <i>SCR</i>          | <u>GCTAATACGACTCACTATAGAAGATCAGTTGGG</u><br>TGACAGTGGGTTACATCGAACTGGATCTCAA<br>CAGCGGTAAGATCCTTGAGAGTTTTGCCCCGA<br>AGAAGTTTTCCAAT       | GCTAATACGACTCA<br>CTATAGAAGATCAG<br>TTGGGTGCAC | ATTGGAAAACGTTCT<br>TCGGG |

**Table S2: Sequences of snoRNAs and SCR control RNA sequences (bold).** Sequences were employed for the generation of T7 transcripts and their respective primers are indicated. The T7 promoter sequence is underlined.

| antibody           | company        | product-no. | clonality<br>[clone]   | host   | dilution          |
|--------------------|----------------|-------------|------------------------|--------|-------------------|
| <b>anti-FMRP</b>   | Abcam          | ab264380    | poly                   | rabbit | 5,000             |
| <b>anti-SMN</b>    | Abcam          | ab108531    | mono<br>[EPR4429]      | rabbit | 1,000             |
| <b>anti-NUFIP1</b> | Cell signaling | #37783      | poly                   | rabbit | 1,000             |
| <b>anti-USP7</b>   | Abcam          | ab264422    | mono<br>[BLR072G]      | rabbit | 1,000             |
| <b>anti-GFP</b>    | Roche          | 11814460001 | mono<br>[7.1 and 13.1] | mouse  | 1,000             |
| <b>anti-mouse</b>  | Dako           | P0447       | poly                   | goat   | 3,000             |
| <b>anti-rabbit</b> | Thermo Fischer | 31463       | poly                   | goat   | 3,000 -<br>10,000 |

**Table S3: Antibodies used in western blot analyses.** Indicated are all antibodies as well as their clonality, the host they were derived from and the dilution which was employed in experiments.

| <b>name</b>              | <b>Sequence [5' to 3']</b>                                                                                                                                                                                                                                                                                                                                                                                                                                      | <b>forward [5' to 3']</b>  | <b>reverse [5' to 3']</b>  |
|--------------------------|-----------------------------------------------------------------------------------------------------------------------------------------------------------------------------------------------------------------------------------------------------------------------------------------------------------------------------------------------------------------------------------------------------------------------------------------------------------------|----------------------------|----------------------------|
| <i>M2_5'</i><br>(356 nt) | CTGGGTCTCTCTGAAAGCCCAGGG<br>AGCTCTCTGCCCAGTTGTGTCTG<br>AGGTCGCAAGTGTCTCTCCGGGAT<br>CCAGTGCCACCCAGGATAATTCCAA<br>GGTGGAGGCACAGCCCTTGTCTCC<br>CTTGGATGAGAGGGCAAATGCGTT<br>GGTGCAGTTCCTCTTAGTCAAGGAC<br>CAAGCCAAGGTGCCTGTCCAGCGC<br>TCGGAGATGGTCAAAGTCATCCTCC<br>GAGAGTATAAAGATGAGTGCTTAGA<br>TATCATCAACCGTGCCAACAATAAG<br>CTGGAGTGTGCCTTTGGTTATCAAT<br>TGAAAGAAATTGATACCAAAAACCA<br>CGCCTATATTATCATCAACAAGCTG<br>GGCTACCATACAGGGAATTTGGTGG<br>CATCCTATTTAGACAGGCC | GTACACCGATGG<br>CCCAG      | AACTTGAGACTGG<br>ATTGCGAG  |
| <i>M2_3'</i><br>(390 nt) | CTGGGTCTCTCTGAAAGCCCAGGG<br>AGCTCTCTGCCCAGTTGTGTCTG<br>AGGTCGCAAGTGTCTCTCCGGGAT<br>CCAGTGCCACCCAGGATAATTCCAA<br>GGTGGAGGCACAGCCCTTGTCTCC<br>CTTGGATGAGAGGGCAAATGCGTT<br>GGTGCAGTTCCTCTTAGTCAAGGAC<br>CAAGCCAAGGTGCCTGTCCAGCGC<br>TCGGAGATGGTCAAAGTCATCCTCC<br>GAGAGTATAAAGATGAGTGCTTAGA<br>TATCATCAACCGTGCCAACAATAAG<br>CTGGAGTGTGCCTTTGGTTATCAAT<br>TGAAAGAAATTGATACCAAAAACCA<br>CGCCTATATTATCATCAACAAGCTG<br>GGCTACCATACAGGGAATTTGGTGG<br>CATCCTATTTAGACAGGCC | CTGGGTCTCTCTG<br>AAAGCCCAG | GGGCCTGTCTAA<br>ATAGGATGCC |

**Table S4: DIG probe sequences and oligonucleotides employed for probe generation.** Forward and reverse primers for PCR amplification are indicated.

| <b>Target</b>      | <b>Forward [5' to 3']</b>          | <b>Reverse [5' to 3']</b>         |
|--------------------|------------------------------------|-----------------------------------|
| <b>GAPDH</b>       | CCATGGGGAAGGTGAAGGTC               | AGTTAAAAGCAGCCCTGGTGA             |
| <b>EID2</b>        | GGCATCGCTCTGTCCAGTTA               | GCTTGGACATCTCAGACCGT              |
| <b>TBP</b>         | GCAAGGGTTTCTGGTTTGCC               | CAAGCCCTGAGCGTAAGGTG              |
| <b>HPRT</b>        | AGGCGAACCTCTCGGCTTTC               | CTGGTTCATCATCACTAATCACGAC         |
| <b>TUBB</b>        | CAACCAGATCGGGGCCAAGTT              | GAGGCACGTACTTGTGAGAAGA            |
| <b>MAGEL2</b>      | CAAGTTTGGCCTTCTGATGGTG             | CGGACATCCAACCCTAACTTGA            |
| <b>MKRN3</b>       | CATTGAGTTTGTCCAGGGCAG              | TCTGCTTCTCTCAGTCTCTGA             |
| <b>SNORD115_1</b>  | GAGAACCTTATATTATCCTGAAGAGA<br>GGTG | GGCCTCAGCGTAATCCTATTGA            |
| <b>SNORD116_29</b> | GGACCTCAGCTCACAGAAGTG              | GGATCGATGATGACTTAAAAAATGG<br>AAAC |
| <b>SNORD116_08</b> | GGATCGATGATGAGTCCTCCAA             | GGACCTCAGTTCGGATGAGAAC            |
| <b>SNORD116_06</b> | GGATCGATGATGAGTCCTCCAA             | GGACCTCAGTTCGGATGAGAAT            |

|                                |                           |                          |
|--------------------------------|---------------------------|--------------------------|
| <b>SNORD116_06</b><br><b>C</b> | GTGGAAGTTGTCCCTCACTAGTA   | CAAATGAGTGAAAACATACCGTC  |
| <b>SNORD116_29</b><br><b>C</b> | CAAACCTGAACGCCCTCCAC      | AAATGAGTGACCAAGACACTTCTG |
| <b>SNRPN</b>                   | ACTGTTGGCAAGAGTAGCAAGA    | GGCCATCTTGCAGGATACATCT   |
| <b>NDN</b>                     | TACTCCACGAGGGTGTTTTCTG    | AGTTTGGAAGAAGTCACCAGCA   |
| <b>SNORD109A</b>               | GGATCGATGATGAGAATAATTGTC  | GGACCTCAGATTGACATCTG     |
| <b>SNORD11B</b>                | CTGATGGCAATGATGATTTTTACAC | GATGGCATCAGATGAGGTAGT    |
| <b>SNORD32</b>                 | CAGTGATGAGCAACATTCACCA    | GAGCGGTGCATGGGGTTGAT     |
| <b>SNORD100</b>                | GCTGTACATGATGACAACTGGC    | GTGACATGGCAGTTTCCTCATG   |

**Table S5: Primers used in qPCR analysis.** For quantification of gene expression by qPCR forward and reverse primers for respective genes are indicated.

| <b>MAGEL2</b> |                                          |       | <b>MAGEL2 p.(Gln666Profs*47)</b> |                                        |       |
|---------------|------------------------------------------|-------|----------------------------------|----------------------------------------|-------|
| Position      | Sequence                                 | Score | Position                         | Sequence                               | Score |
| 4-33          | LSKNLGDSSPPAEAPKPPV<br>YSRPTVLMRAP       | 4.3   | 4-33                             | LSKNLGDSSPPAEAPKPPV<br>YSRPTVLMRAP     | 4.3   |
| 277-307       | PMAKPPGPGVLMIHPPGAR<br>APMTQPPASGAP      | 2.3   | 277-307                          | PMAKPPGPGVLMIHPPGAR<br>APMTQPPASGAP    | 2.3   |
| 292-322       | PGARAPMTQPPASGAPMA<br>QPAAPPAQPMAPP      | 2.3   | 292-322                          | PGARAPMTQPPASGAPMA<br>QPAAPPAQPMAPP    | 2.3   |
| 494-527       | RQAPPPIRPAPQVLATQPPL<br>WQALPPPPPLRQAP   | 3.1   | 494-527                          | RQAPPPIRPAPQVLATQPPL<br>WQALPPPPPLRQAP | 3.1   |
| 587-617       | WQAPKGQPPVPHEIPTSM<br>EFQEVQQTQALAW      | 2.5   | 587-617                          | WQAPKGQPPVPHEIPTSM<br>EFQEVQQTQALAW    | 2.5   |
| 617-648       | WQAQKAPTHIWQPLPAQE<br>AQRQAPPLVQLEQP     | 2.8   | 617-648                          | WQAQKAPTHIWQPLPAQE<br>AQRQAPPLVQLEQP   | 2.8   |
| 654-684       | PSQKAVQIQLPPQQAQAS<br>GPQAEVPTLPLQP      | 2.5   | 654-683                          | PSQKAVQIQLPPPAGPGIG<br>SASGAHTAAP      | 2.1   |
| 709-739       | GSAKSLMTPSGECCRASSID<br>RRGSSKERRTSS     | 3.1   |                                  |                                        |       |
| 728-760       | RRGSSKERRTSSKERRAPS<br>KDRMIFAATFCAPK    | 3.0   |                                  |                                        |       |
| 735-764       | RRTSSKERRAPSKDRMIFA<br>ATFCAPKAVSA       | 2.5   |                                  |                                        |       |
| 735-766       | RRTSSKERRAPSKDRMIFA<br>ATFCAPKAVSAAR     | 3.0   |                                  |                                        |       |
| 735-770       | RRTSSKERRAPSKDRMIFA<br>ATFCAPKAVSAARAHLP | 2.0   |                                  |                                        |       |
| 742-774       | RRAPSKDRMIFAATFCAPK                      | 2.4   |                                  |                                        |       |



|           |                                          |     |  |  |
|-----------|------------------------------------------|-----|--|--|
|           | AVSAARAHLPAAWK                           |     |  |  |
| 802-832   | NAFKGPSAASETPKSLPYA<br>LQDPFACVEALP      | 2.7 |  |  |
| 880-914   | RRSGKATRKKKHLEAQEDS<br>RGHTLAFHDWQGPRPW  | 2.9 |  |  |
| 880-915   | RRSGKATRKKKHLEAQEDS<br>RGHTLAFHDWQGPRPWE | 2.3 |  |  |
| 881-915   | RSGKATRKKKHLEAQEDS<br>RGHTLAFHDWQGPRPWE  | 2.9 |  |  |
| 887-916   | RKKKHLEAQEDSRGHTLAF<br>HDWQGPRPWEN       | 2.5 |  |  |
| 952-979   | SRILSGWEGPSASWALSA<br>WEGPSTSRAL         | 2.4 |  |  |
| 1161-1192 | FVRQKYLEYRRIPYTEPAE<br>YEFLWGPRAFLET     | 2.0 |  |  |
| 1163-1197 | RQKYLEYRRIPYTEPAEYE<br>FLWGPRAFLETSMMLV  | 2.4 |  |  |
|           |                                          |     |  |  |
| 883-893   | GKATRKKKHLE                              | 8.5 |  |  |

**Tab S6: Nuclear localization signal (NLS) motif prediction performed with the cNLS mapper online tool <sup>3</sup>.** NLS are listed for MAGEL2 protein and the truncated MAGEL2 p.(Gln666Profs\*47). Shown are amino acid position, NLS candidate sequence and cut-off score.

| MAGEL2    |                 |       | MAGEL2 p.(Gln666Profs*47) |                 |       |
|-----------|-----------------|-------|---------------------------|-----------------|-------|
| Position  | Sequence        | Score | Position                  | Sequence        | Score |
| 65-79     | WEAPQGQLPAPVVPM | 0.024 | 65-79                     | WEAPQGQLPAPVVPM | 0.022 |
| 235-249   | PGVLMAQPLTPGVLM | 0.011 | 235-249                   | PGVLMAQPLTPGVLM | 0.124 |
| 236-250   | GVLMAQPLTPGVLMV | 0.068 | 236-250                   | GVLMAQPLTPGVLMV | 0.255 |
| 592-606   | GQPPVPHEIPTSMEF | 0.042 | 592-606                   | GQPPVPHEIPTSMEF | 0.031 |
| 668-682   | AQASGPQAEVPTLPL | 0.022 |                           |                 |       |
| 694-708   | QAQPGPPVAAANFPL | 0.046 |                           |                 |       |
| 842-856   | MNASKASQAVPTFLM | 0.017 |                           |                 |       |
| 985-999   | PGSSLPVVVSEVASV | 0.074 |                           |                 |       |
| 1016-1030 | PLSPLDERANALVQF | 0.109 |                           |                 |       |
| 1018-1032 | SPLDERANALVQFLL | 0.144 |                           |                 |       |
| 1019-1033 | PLDERANALVQFLLV | 0.186 |                           |                 |       |
| 1103-1117 | SYLDRPKFGLLMVVL | 0.262 |                           |                 |       |

|           |                  |       |  |  |  |
|-----------|------------------|-------|--|--|--|
| 1105-1119 | LDRPKFGLLMVVLSL  | 0.204 |  |  |  |
| 1106-1120 | DRPKFGLLMVVLSLI  | 0.115 |  |  |  |
| 1107-1121 | RPKFGLLMVVLSLIF  | 0.473 |  |  |  |
| 1108-1122 | PKFGLLMVVLSLIFM  | 0.201 |  |  |  |
| 1123-1137 | KGNCVREDLIFNFLF  | 0.051 |  |  |  |
| 1127-1141 | VREDLIFNFLFKLGL  | 0.332 |  |  |  |
| 1129-1143 | EDLIFNFLFKLGLDV  | 0.238 |  |  |  |
| 1146-1160 | TNGLFGNTKKLITEV  | 0.007 |  |  |  |
| 1148-1162 | GLFGNTKKLITEVVFV | 0.005 |  |  |  |
| 1183-1197 | LWGPRAFLETSKMLV  | 0.015 |  |  |  |
| 1184-1198 | WGPRAFLETSKMLVL  | 0.186 |  |  |  |
| 1186-1200 | PRAFLETSKMLVLRV  | 0.084 |  |  |  |

**Table S7: Nuclear export signal (NES) motif prediction performed with the LocNES online server tool <sup>4</sup>. NES are listed for MAGEL2 and the truncated MAGEL2 p.(Gln666Profs\*47). Shown are amino acid position, NES candidate sequence and probability score.**

| Term                                                                            | Genes                                 |
|---------------------------------------------------------------------------------|---------------------------------------|
| Positive Regulation Of DNA-templated Transcription (GO:0045893)                 | HMGA1, SFPQ, TAF15, ILF3, HMGN1, YBX1 |
| Regulation Of DNA-templated Transcription (GO:0006355)                          | FUS, ILF3, YBX1, HMGA1, SFPQ, TAF15   |
| Regulation Of Nucleic Acid-Templated Transcription (GO:1903506)                 | FUS, HMGA1, SFPQ, YBX1                |
| Regulation Of Transcription By RNA Polymerase II (GO:0006357)                   | FUS, YBX1, HMGA1, SFPQ                |
| Negative Regulation Of DNA-templated Transcription (GO:0045892)                 | HMGA1, SFPQ, ILF3                     |
| Negative Regulation Of Nucleic Acid-Templated Transcription (GO:1903507)        | ILF3, HMGA1, SFPQ                     |
| Positive Regulation Of Nucleic Acid-Templated Transcription (GO:1903508)        | ILF3, HMGA1, TAF15                    |
| Positive Regulation Of Transcription By RNA Polymerase II (GO:0045944)          | HMGA1, SFPQ, YBX1                     |
| DNA-templated Transcription Initiation (GO:0006352)                             | ELOB                                  |
| Negative Regulation Of Transcription By RNA Polymerase II (GO:0000122)          | SFPQ                                  |
| Positive Regulation Of DNA-templated Transcription, Elongation (GO:0032786)     | HMGN1                                 |
| Positive Regulation Of Transcription Regulatory Region DNA Binding (GO:2000679) | H1-0                                  |
| Regulation Of DNA-templated Transcription Elongation (GO:0032784)               | HMGN1                                 |
| Regulation Of Transcription Regulatory Region DNA Binding (GO:2000677)          | H1-0                                  |

|                                                                     |      |
|---------------------------------------------------------------------|------|
| Transcription By RNA Polymerase II (GO:0006366)                     | ELOB |
| Transcription Initiation At RNA Polymerase II Promoter (GO:0006367) | ELOB |

**Table S8: Mutual protein interaction partners of MAGEL2 and MAGEL2 p.(Gln666Profs\*47) with implication in transcription.**

| Summarized term                         | GO terms included                                                   |
|-----------------------------------------|---------------------------------------------------------------------|
| Transcription                           | Transcription By RNA Polymerase II (GO:0006366)                     |
|                                         | Transcription Initiation At RNA Polymerase II Promoter (GO:0006367) |
|                                         | Transcription Preinitiation Complex Assembly (GO:0070897)           |
| snoRNAs                                 | Box C/D snoRNP Assembly (GO:0000492)                                |
|                                         | Polyadenylation-Dependent snoRNA 3'-End Processing (GO:0071051)     |
|                                         | snoRNA Localization (GO:0048254)                                    |
| mRNA stabilization                      | 3'-UTR-mediated mRNA Stabilization (GO:0070935)                     |
|                                         | CRD-mediated mRNA Stabilization (GO:0070934)                        |
|                                         | mRNA Stabilization (GO:0048255)                                     |
|                                         | Regulation Of 3'-UTR-mediated mRNA Stabilization (GO:1905868)       |
| Pyruvate metabolism and Gluconeogenesis | Gluconeogenesis (GO:0006094)                                        |
|                                         | Negative Regulation Of Gluconeogenesis (GO:0045721)                 |
|                                         | Pyruvate Metabolic Process (GO:0006090)                             |
|                                         | Positive Regulation Of Gluconeogenesis (GO:0045722)                 |
|                                         | Regulation Of Gluconeogenesis (GO:0006111)                          |

**Table S9: GO terms significantly regulated in the two different approaches (BioID and GFP-CoIP).**

## Supplemental References

1. Chen, E.Y., Tan, C.M., Kou, Y., Duan, Q., Wang, Z., Meirelles, G.V., Clark, N.R., and Ma'ayan, A. (2013). Enrichr: interactive and collaborative HTML5 gene list enrichment analysis tool. *BMC Bioinformatics* 14, 128. <https://doi.org/10.1186/1471-2105-14-128>.
2. Kassambara, A. (2023). rstatix: Pipe-Friendly Framework for Basic Statistical Tests.
3. Kosugi, S., Hasebe, M., Tomita, M., and Yanagawa, H. (2009). Systematic identification of cell cycle-dependent yeast nucleocytoplasmic shuttling proteins by prediction of composite motifs. *Proc. Natl. Acad. Sci. U. S. A.* 106, 10171–10176. <https://doi.org/10.1073/pnas.0900604106>.
4. Xu, D., Marquis, K., Pei, J., Fu, S.-C., Cağatay, T., Grishin, N.V., and Chook, Y.M. (2015). LocNES: a computational tool for locating classical NESs in CRM1 cargo proteins. *Bioinforma. Oxf. Engl.* 31, 1357–1365. <https://doi.org/10.1093/bioinformatics/btu826>.
